# Supplementary material for: Facial nerve electrodiagnostics for patients with facial palsy: a clinical practice guideline
Source: Springer Nature journal article supplement (doi:10.1007/s00405-020-05949-1), 2020-04-08
Supplement: MOESM1 [file 17878874]

Supplement Figure 1

Guntinas-Lichius et al.

**Facial nerve electrodiagnostics for patients with facial palsy - a clinical practice guideline**

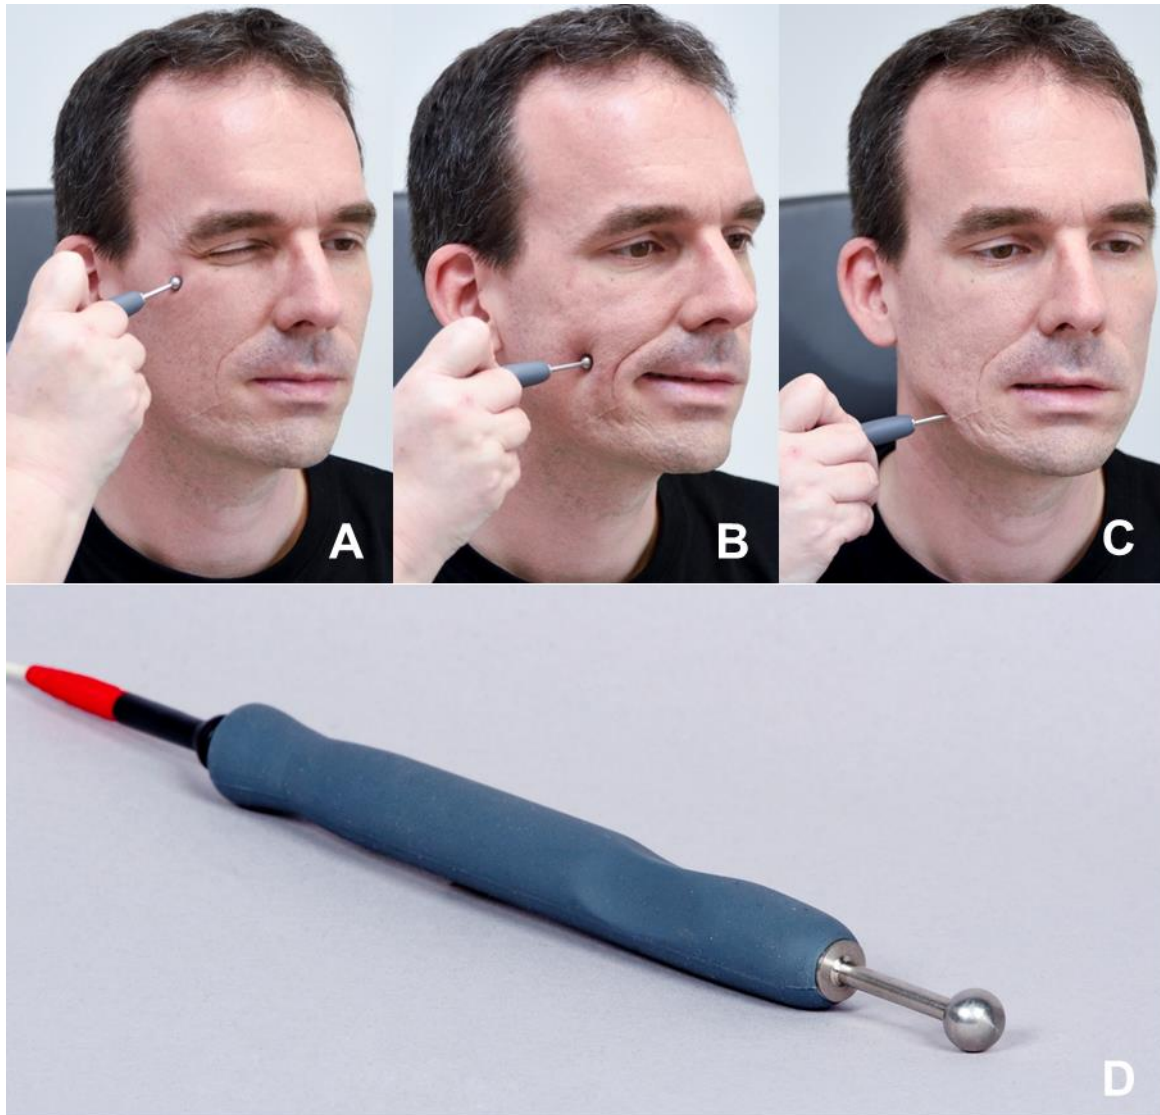

**Supplement Figure 1.** Facial nerve mapping (FNM). **A:** FNM of a zygomatic branch innervating the orbicularis oculi muscle; **B:** of a buccalis branch innervating the zygomaticus muscle; **C:** of a marginalis branch innervating the depressor anguli oris. **D:** Example of a ball electrode used as stimulator during FNM.
